# Supplementary material
Source: Springer Nature journal article supplement (https://www.springermedizin.de/resource/supplementary/12990_2009_232_MOESM9_ESM.pdf/9612842)

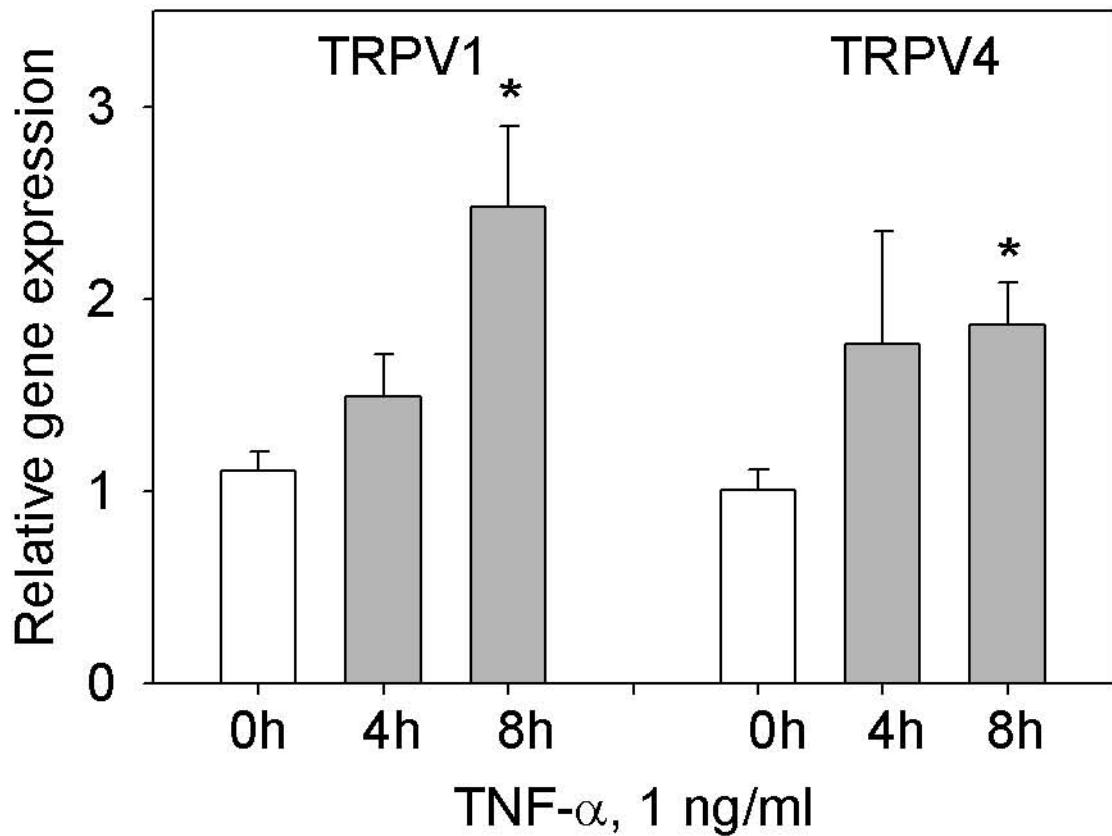

Supplement: MOESM9 [file 9612842]
